# Supplementary material for: COSMO-RS analysis on mixing properties obtained for the systems 1-butyl-X-methylpyridinium tetrafluoroborate [X = 2,3,4] and 1,ω-dibromoalkanes [ω = 1–6]
Source: Royal Society of Chemistry journal article supplement (doi:10.1039/c0cp02169e), 2011-01-01
Supplement: c0cp02169e.pdf [file c0cp02169e.pdf]

TABLE S1: Experimental  $x_{\text{IL}}-T$  data for  $x_{\text{IL}}[\text{bXmpy}][\text{BF}_4] + (1-x_{\text{IL}})$  1, $\omega$ -dibromoalkane.

| $x_{\text{IL}}$                                                                   | $T/\text{K}$ | $x_{\text{IL}}$ | $T/\text{K}$ | $x_{\text{IL}}$ | $T/\text{K}$ |
|-----------------------------------------------------------------------------------|--------------|-----------------|--------------|-----------------|--------------|
| $x_{\text{IL}}[\text{b2mpy}][\text{BF}_4] + (1-x_{\text{IL}})$ 1,2-dibromoethane  |              |                 |              |                 |              |
| 0.306                                                                             | 411.08       | 0.404           | 367.52       | 0.488           | 317.72       |
| 0.342                                                                             | 394.87       | 0.419           | 358.01       | 0.515           | 301.67       |
| 0.385                                                                             | 377.66       | 0.461           | 336.61       | 0.529           | 286.83       |
| $x_{\text{IL}}[\text{b2mpy}][\text{BF}_4] + (1-x_{\text{IL}})$ 1,3-dibromopropane |              |                 |              |                 |              |
| 0.052                                                                             | 328.79       | 0.214           | 332.07       | 0.405           | 302.75       |
| 0.106                                                                             | 334.54       | 0.276           | 326.31       | 0.471           | 280.47       |
| 0.159                                                                             | 334.86       | 0.339           | 318.18       |                 |              |
| $x_{\text{IL}}[\text{b2mpy}][\text{BF}_4] + (1-x_{\text{IL}})$ 1,4-dibromobutane  |              |                 |              |                 |              |
| 0.322                                                                             | 401.28       | 0.528           | 354.88       | 0.625           | 309.84       |
| 0.369                                                                             | 394.81       | 0.560           | 345.25       | 0.647           | 289.33       |
| 0.419                                                                             | 385.94       | 0.586           | 330.69       |                 |              |
| 0.473                                                                             | 372.25       | 0.609           | 317.04       |                 |              |
| $x_{\text{IL}}[\text{b2mpy}][\text{BF}_4] + (1-x_{\text{IL}})$ 1,5-dibromopentane |              |                 |              |                 |              |
| 0.587                                                                             | 422.65       | 0.714           | 377.23       | 0.813           | 326.18       |
| 0.616                                                                             | 412.76       | 0.748           | 362.16       | 0.853           | 302.71       |
| 0.649                                                                             | 400.84       | 0.771           | 350.58       | 0.887           | 288.47       |
| 0.689                                                                             | 387.22       | 0.777           | 345.28       |                 |              |
| $x_{\text{IL}}[\text{b2mpy}][\text{BF}_4] + (1-x_{\text{IL}})$ 1,6-dibromohexane  |              |                 |              |                 |              |
| 0.747                                                                             | 441.88       | 0.837           | 381.32       | 0.920           | 304.96       |
| 0.765                                                                             | 429.31       | 0.852           | 366.71       | 0.938           | 290.72       |
| 0.797                                                                             | 408.57       | 0.869           | 350.41       |                 |              |
| 0.811                                                                             | 396.29       | 0.891           | 328.64       |                 |              |
| $x_{\text{IL}}[\text{b3mpy}][\text{BF}_4] + (1-x_{\text{IL}})$ 1,2-dibromoethane  |              |                 |              |                 |              |
| 0.251                                                                             | 404.73       | 0.323           | 354.84       | 0.396           | 303.16       |
| 0.278                                                                             | 389.14       | 0.351           | 338.07       | 0.417           | 287.86       |
| 0.301                                                                             | 370.38       | 0.378           | 319.9        |                 |              |
| $x_{\text{IL}}[\text{b3mpy}][\text{BF}_4] + (1-x_{\text{IL}})$ 1,3-dibromopropane |              |                 |              |                 |              |
| 0.051                                                                             | 307.31       | 0.135           | 306.22       | 0.237           | 294.03       |
| 0.089                                                                             | 307.97       | 0.186           | 302.46       | 0.294           | 279.19       |
| $x_{\text{IL}}[\text{b3mpy}][\text{BF}_4] + (1-x_{\text{IL}})$ 1,4-dibromobutane  |              |                 |              |                 |              |
| 0.083                                                                             | 379.09       | 0.314           | 357.74       | 0.484           | 302.09       |
| 0.155                                                                             | 380.24       | 0.358           | 342.43       | 0.523           | 288.17       |
| 0.215                                                                             | 378.07       | 0.397           | 329.60       |                 |              |
| 0.271                                                                             | 369.46       | 0.438           | 316.52       |                 |              |
| $x_{\text{IL}}[\text{b3mpy}][\text{BF}_4] + (1-x_{\text{IL}})$ 1,5-dibromopentane |              |                 |              |                 |              |
| 0.511                                                                             | 421.43       | 0.657           | 355.31       | 0.752           | 299.87       |
| 0.561                                                                             | 402.57       | 0.672           | 345.89       | 0.773           | 285.17       |
| 0.584                                                                             | 391.54       | 0.707           | 328.58       |                 |              |
| 0.619                                                                             | 376.08       | 0.729           | 312.68       |                 |              |
| $x_{\text{IL}}[\text{b3mpy}][\text{BF}_4] + (1-x_{\text{IL}})$ 1,6-dibromohexane  |              |                 |              |                 |              |
| 0.668                                                                             | 442.31       | 0.771           | 383.41       | 0.846           | 323.49       |
| 0.707                                                                             | 423.89       | 0.799           | 364.12       | 0.864           | 304.67       |
| 0.740                                                                             | 401.52       | 0.829           | 341.56       | 0.887           | 286.32       |
| $x_{\text{IL}}[\text{b4mpy}][\text{BF}_4] + (1-x_{\text{IL}})$ 1,2-dibromoethane  |              |                 |              |                 |              |
| 0.267                                                                             | 388.01       | 0.353           | 334.86       | 0.417           | 297.68       |
| 0.297                                                                             | 369.42       | 0.381           | 319.23       | 0.430           | 286.86       |

Supplementary Material (ESI) for *PCCP*  
 This journal is © the Owner Societies 2011

|       |                                                                                     |       |        |       |        |
|-------|-------------------------------------------------------------------------------------|-------|--------|-------|--------|
| 0.323 | 350.91                                                                              | 0.402 | 306.77 |       |        |
|       | $x_{\text{IL}}[\text{b4mpy}][\text{BF}_4] + (1 - x_{\text{IL}})$ 1,3-dibromopropane |       |        |       |        |
| 0.054 | 294.48                                                                              | 0.114 | 293.50 | 0.204 | 282.06 |
| 0.082 | 294.82                                                                              | 0.158 | 289.36 |       |        |
|       | $x_{\text{IL}}[\text{b4mpy}][\text{BF}_4] + (1 - x_{\text{IL}})$ 1,4-dibromobutane  |       |        |       |        |
| 0.099 | 356.74                                                                              | 0.249 | 361.20 | 0.432 | 324.57 |
| 0.124 | 359.89                                                                              | 0.284 | 356.96 | 0.469 | 300.86 |
| 0.152 | 361.27                                                                              | 0.319 | 352.38 | 0.491 | 284.52 |
| 0.182 | 362.61                                                                              | 0.356 | 347.26 |       |        |
| 0.214 | 362.32                                                                              | 0.393 | 338.69 |       |        |
|       | $x_{\text{IL}}[\text{b4mpy}][\text{BF}_4] + (1 - x_{\text{IL}})$ 1,5-dibromopentane |       |        |       |        |
| 0.513 | 413.49                                                                              | 0.636 | 366.13 | 0.726 | 321.43 |
| 0.563 | 394.74                                                                              | 0.665 | 352.47 | 0.759 | 307.66 |
| 0.599 | 381.39                                                                              | 0.700 | 336.02 | 0.796 | 288.76 |
|       | $x_{\text{IL}}[\text{b4mpy}][\text{BF}_4] + (1 - x_{\text{IL}})$ 1,6-dibromohexane  |       |        |       |        |
| 0.710 | 412.55                                                                              | 0.800 | 362.39 | 0.886 | 300.83 |
| 0.741 | 389.23                                                                              | 0.827 | 345.09 | 0.901 | 290.17 |
| 0.779 | 378.65                                                                              | 0.853 | 323.24 |       |        |

TABLE S2. Excess Molar Enthalpies,  $H_m^E$ , for binaries  $x_{IL}[\text{bXmpy}][\text{BF}_4] + (1-x_{IL})$  1, $\omega$ -dibromoalkane at  $T = 298.15$  K.

| $x_{IL}$                                                            | $\frac{H_m^E}{\text{J} \cdot \text{mol}^{-1}}$ | $x_{IL}$ | $\frac{H_m^E}{\text{J} \cdot \text{mol}^{-1}}$ | $x_{IL}$ | $\frac{H_m^E}{\text{J} \cdot \text{mol}^{-1}}$ |
|---------------------------------------------------------------------|------------------------------------------------|----------|------------------------------------------------|----------|------------------------------------------------|
| $x_{IL}[\text{b2mpy}][\text{BF}_4] + (1-x_{IL})$ 1,1-dibromomethane |                                                |          |                                                |          |                                                |
| 0.1165                                                              | -111                                           | 0.2400   | -195                                           | 0.5228   | -181                                           |
| 0.1481                                                              | -133                                           | 0.2658   | -207                                           | 0.5800   | -167                                           |
| 0.1622                                                              | -142                                           | 0.3243   | -217                                           | 0.6473   | -148                                           |
| 0.1785                                                              | -154                                           | 0.3902   | -209                                           | 0.7218   | -124                                           |
| 0.1965                                                              | -166                                           | 0.4294   | -203                                           | 0.8059   | -98                                            |
| 0.2170                                                              | -181                                           | 0.4723   | -195                                           | 0.8948   | -63                                            |
| $x_{IL}[\text{b2mpy}][\text{BF}_4] + (1-x_{IL})$ 1,2-dibromoethane  |                                                |          |                                                |          |                                                |
| 0.5411                                                              | 53                                             | 0.6708   | 59                                             | 0.9145   | 43                                             |
| 0.5760                                                              | 55                                             | 0.7497   | 59                                             |          |                                                |
| 0.6028                                                              | 57                                             | 0.8343   | 54                                             |          |                                                |
| $x_{IL}[\text{b2mpy}][\text{BF}_4] + (1-x_{IL})$ 1,3-dibromopropane |                                                |          |                                                |          |                                                |
| 0.4322                                                              | 122                                            | 0.6229   | 84                                             | 0.8638   | 41                                             |
| 0.4676                                                              | 115                                            | 0.6628   | 77                                             | 0.9099   | 34                                             |
| 0.5058                                                              | 105                                            | 0.7052   | 65                                             | 0.9528   | 19                                             |
| 0.5446                                                              | 99                                             | 0.7503   | 60                                             |          |                                                |
| 0.5833                                                              | 94                                             | 0.8183   | 51                                             |          |                                                |
| $x_{IL}[\text{b2mpy}][\text{BF}_4] + (1-x_{IL})$ 1,4-dibromobutane  |                                                |          |                                                |          |                                                |
| 0.6495                                                              | 33                                             | 0.8194   | 22                                             | 0.9646   | 4                                              |
| 0.7042                                                              | 30                                             | 0.8754   | 15                                             |          |                                                |
| 0.7637                                                              | 27                                             | 0.9214   | 8                                              |          |                                                |
| $x_{IL}[\text{b3mpy}][\text{BF}_4] + (1-x_{IL})$ 1,1-dibromomethane |                                                |          |                                                |          |                                                |
| 0.1154                                                              | -189                                           | 0.2325   | -317                                           | 0.4484   | -327                                           |
| 0.1388                                                              | -218                                           | 0.2589   | -336                                           | 0.5074   | -306                                           |
| 0.1534                                                              | -237                                           | 0.2894   | -348                                           | 0.5739   | -279                                           |
| 0.1699                                                              | -255                                           | 0.3203   | -352                                           | 0.6571   | -240                                           |
| 0.1881                                                              | -276                                           | 0.3570   | -353                                           | 0.7574   | -189                                           |
| 0.2089                                                              | -296                                           | 0.3991   | -343                                           | 0.8761   | -127                                           |
| $x_{IL}[\text{b3mpy}][\text{BF}_4] + (1-x_{IL})$ 1,2-dibromoethane  |                                                |          |                                                |          |                                                |
| 0.4246                                                              | 31                                             | 0.5878   | 43                                             | 0.7673   | 43                                             |
| 0.4821                                                              | 35                                             | 0.6288   | 45                                             | 0.8448   | 38                                             |
| 0.5132                                                              | 38                                             | 0.6719   | 45                                             | 0.8997   | 33                                             |
| 0.5465                                                              | 41                                             | 0.7188   | 44                                             | 0.9531   | 24                                             |
| $x_{IL}[\text{b3mpy}][\text{BF}_4] + (1-x_{IL})$ 1,3-dibromopropane |                                                |          |                                                |          |                                                |
| 0.2542                                                              | 282                                            | 0.4944   | 288                                            | 0.7434   | 112                                            |
| 0.3055                                                              | 318                                            | 0.5346   | 257                                            | 0.7879   | 92                                             |
| 0.3401                                                              | 331                                            | 0.5763   | 223                                            | 0.8341   | 75                                             |
| 0.3649                                                              | 336                                            | 0.6166   | 191                                            | 0.8806   | 60                                             |
| 0.4211                                                              | 329                                            | 0.6580   | 159                                            | 0.9222   | 43                                             |
| 0.4571                                                              | 312                                            | 0.6989   | 133                                            | 0.9621   | 28                                             |
| $x_{IL}[\text{b3mpy}][\text{BF}_4] + (1-x_{IL})$ 1,4-dibromobutane  |                                                |          |                                                |          |                                                |
| 0.5164                                                              | 108                                            | 0.7391   | 67                                             | 0.9624   | 23                                             |
| 0.5543                                                              | 103                                            | 0.7900   | 59                                             | 0.9826   | 15                                             |
| 0.5949                                                              | 94                                             | 0.8399   | 48                                             | 0.9912   | 10                                             |
| 0.6402                                                              | 84                                             | 0.8879   | 38                                             | 0.9985   | 2                                              |

Supplementary Material (ESI) for *PCCP*  
This journal is © the Owner Societies 2011

|        |                                                                                     |        |      |        |      |
|--------|-------------------------------------------------------------------------------------|--------|------|--------|------|
| 0.6893 | 74                                                                                  | 0.9329 | 29   |        |      |
|        | $x_{\text{IL}}[\text{b3mpy}][\text{BF}_4] + (1 - x_{\text{IL}})$ 1,5-dibromopentane |        |      |        |      |
| 0.7578 | 24                                                                                  | 0.8722 | 21   | 0.9577 | 16   |
| 0.7904 | 23                                                                                  | 0.9043 | 20   | 0.9807 | 13   |
| 0.8216 | 23                                                                                  | 0.9328 | 18   |        |      |
|        | $x_{\text{IL}}[\text{b4mpy}][\text{BF}_4] + (1 - x_{\text{IL}})$ 1,1-dibromomethane |        |      |        |      |
| 0.0980 | -160                                                                                | 0.2275 | -281 | 0.4540 | -285 |
| 0.1168 | -182                                                                                | 0.2562 | -298 | 0.5105 | -264 |
| 0.1431 | -208                                                                                | 0.2890 | -309 | 0.5786 | -238 |
| 0.1589 | -227                                                                                | 0.3237 | -314 | 0.6514 | -205 |
| 0.1806 | -244                                                                                | 0.3628 | -310 | 0.7398 | -168 |
| 0.2024 | -264                                                                                | 0.4045 | -299 | 0.8499 | -111 |
|        | $x_{\text{IL}}[\text{b4mpy}][\text{BF}_4] + (1 - x_{\text{IL}})$ 1,2-dibromoethane  |        |      |        |      |
| 0.4459 | 55                                                                                  | 0.6120 | 65   | 0.8647 | 63   |
| 0.4738 | 57                                                                                  | 0.6665 | 66   | 0.9321 | 54   |
| 0.5169 | 59                                                                                  | 0.7281 | 67   |        |      |
| 0.5620 | 62                                                                                  | 0.7919 | 66   |        |      |
|        | $x_{\text{IL}}[\text{b4mpy}][\text{BF}_4] + (1 - x_{\text{IL}})$ 1,3-dibromopropane |        |      |        |      |
| 0.1158 | 185                                                                                 | 0.3998 | 428  | 0.6653 | 215  |
| 0.1753 | 281                                                                                 | 0.4549 | 402  | 0.7093 | 185  |
| 0.2142 | 328                                                                                 | 0.5131 | 354  | 0.7538 | 161  |
| 0.2798 | 387                                                                                 | 0.5471 | 319  | 0.8021 | 134  |
| 0.3224 | 415                                                                                 | 0.5846 | 279  | 0.8486 | 96   |
| 0.3472 | 426                                                                                 | 0.6261 | 243  | 0.8965 | 71   |
|        | $x_{\text{IL}}[\text{b4mpy}][\text{BF}_4] + (1 - x_{\text{IL}})$ 1,4-dibromobutane  |        |      |        |      |
| 0.4998 | 159                                                                                 | 0.7521 | 85   | 0.9182 | 51   |
| 0.5563 | 137                                                                                 | 0.7968 | 74   | 0.9511 | 40   |
| 0.6125 | 118                                                                                 | 0.8440 | 68   | 0.9790 | 24   |
| 0.6844 | 97                                                                                  | 0.8861 | 58   |        |      |
|        | $x_{\text{IL}}[\text{b4mpy}][\text{BF}_4] + (1 - x_{\text{IL}})$ 1,5-dibromopentane |        |      |        |      |
| 0.7527 | 10                                                                                  | 0.8450 | 19   | 0.9318 | 16   |
| 0.7973 | 15                                                                                  | 0.8922 | 19   | 0.9679 | 11   |

TABLE S3: Excess Molar Volumes,  $V_m^E$ , for binaries  $x_{IL}[\text{bXmpy}][\text{BF}_4] + (1-x_{IL})$  1, $\omega$ -dibromoalkane at  $T = 298.15$  K.

| $x_{IL}$                                                            | $\frac{\rho}{\text{kg} \cdot \text{m}^{-3}}$ | $\frac{10^9 V_m^E}{\text{m}^3 \cdot \text{mol}^{-1}}$ | $x_{IL}$ | $\frac{\rho}{\text{kg} \cdot \text{m}^{-3}}$ | $\frac{10^9 V_m^E}{\text{m}^3 \cdot \text{mol}^{-1}}$ |
|---------------------------------------------------------------------|----------------------------------------------|-------------------------------------------------------|----------|----------------------------------------------|-------------------------------------------------------|
| $x_{IL}[\text{b2mpy}][\text{BF}_4] + (1-x_{IL})$ 1,1-dibromomethane |                                              |                                                       |          |                                              |                                                       |
| 0.0465                                                              | 2327.89                                      | -86                                                   | 0.5258   | 1513.28                                      | -180                                                  |
| 0.1005                                                              | 2176.97                                      | -128                                                  | 0.6240   | 1427.98                                      | -157                                                  |
| 0.1560                                                              | 2046.17                                      | -186                                                  | 0.7278   | 1352.01                                      | -120                                                  |
| 0.2055                                                              | 1945.20                                      | -213                                                  | 0.7807   | 1317.92                                      | -105                                                  |
| 0.2685                                                              | 1833.77                                      | -223                                                  | 0.8386   | 1283.50                                      | -81                                                   |
| 0.3984                                                              | 1650.42                                      | -220                                                  | 0.9112   | 1244.14                                      | -36                                                   |
| 0.4649                                                              | 1574.68                                      | -207                                                  |          |                                              |                                                       |
| $x_{IL}[\text{b2mpy}][\text{BF}_4] + (1-x_{IL})$ 1,2-dibromoethane  |                                              |                                                       |          |                                              |                                                       |
| 0.6649                                                              | 1378.58                                      | -222                                                  | 0.9077   | 1243.67                                      | -140                                                  |
| 0.7615                                                              | 1319.96                                      | -210                                                  | 0.9599   | 1219.38                                      | -83                                                   |
| 0.8669                                                              | 1263.60                                      | -161                                                  |          |                                              |                                                       |
| $x_{IL}[\text{b2mpy}][\text{BF}_4] + (1-x_{IL})$ 1,3-dibromopropane |                                              |                                                       |          |                                              |                                                       |
| 0.3750                                                              | 1559.80                                      | -135                                                  | 0.6248   | 1382.95                                      | 152                                                   |
| 0.4234                                                              | 1520.62                                      | -56                                                   | 0.7023   | 1338.75                                      | 181                                                   |
| 0.4828                                                              | 1476.53                                      | -15                                                   | 0.7885   | 1294.03                                      | 194                                                   |
| 0.5536                                                              | 1427.88                                      | 60                                                    | 0.8912   | 1246.49                                      | 120                                                   |
| $x_{IL}[\text{b2mpy}][\text{BF}_4] + (1-x_{IL})$ 1,4-dibromobutane  |                                              |                                                       |          |                                              |                                                       |
| 0.6636                                                              | 1346.54                                      | -177                                                  | 0.8126   | 1275.95                                      | 66                                                    |
| 0.6891                                                              | 1333.80                                      | -139                                                  | 0.9010   | 1239.03                                      | 88                                                    |
| 0.7305                                                              | 1313.46                                      | -38                                                   | 0.9727   | 1211.27                                      | 65                                                    |
| 0.7746                                                              | 1292.94                                      | 22                                                    |          |                                              |                                                       |
| $x_{IL}[\text{b3mpy}][\text{BF}_4] + (1-x_{IL})$ 1,1-dibromomethane |                                              |                                                       |          |                                              |                                                       |
| 0.0267                                                              | 2387.07                                      | -43                                                   | 0.5294   | 1491.28                                      | 7                                                     |
| 0.0677                                                              | 2259.04                                      | -71                                                   | 0.6149   | 1416.59                                      | 24                                                    |
| 0.1250                                                              | 2106.17                                      | -86                                                   | 0.7070   | 1347.64                                      | 38                                                    |
| 0.1956                                                              | 1950.44                                      | -95                                                   | 0.8145   | 1279.11                                      | 46                                                    |
| 0.2816                                                              | 1796.32                                      | -67                                                   | 0.8670   | 1249.61                                      | 29                                                    |
| 0.3900                                                              | 1642.94                                      | -48                                                   | 0.9220   | 1220.85                                      | 30                                                    |
| 0.4601                                                              | 1561.31                                      | -12                                                   |          |                                              |                                                       |
| $x_{IL}[\text{b3mpy}][\text{BF}_4] + (1-x_{IL})$ 1,2-dibromoethane  |                                              |                                                       |          |                                              |                                                       |
| 0.4635                                                              | 1512.18                                      | -21                                                   | 0.7560   | 1303.23                                      | 81                                                    |
| 0.5093                                                              | 1473.16                                      | -8                                                    | 0.8780   | 1238.39                                      | 88                                                    |
| 0.5802                                                              | 1417.73                                      | 32                                                    | 0.9305   | 1213.60                                      | 56                                                    |
| 0.6690                                                              | 1356.32                                      | 67                                                    |          |                                              |                                                       |
| $x_{IL}[\text{b3mpy}][\text{BF}_4] + (1-x_{IL})$ 1,3-dibromopropane |                                              |                                                       |          |                                              |                                                       |
| 0.2397                                                              | 1670.83                                      | -63                                                   | 0.6232   | 1368.32                                      | 89                                                    |
| 0.3099                                                              | 1602.86                                      | -56                                                   | 0.6961   | 1325.84                                      | 123                                                   |
| 0.3683                                                              | 1551.15                                      | -26                                                   | 0.7881   | 1277.32                                      | 139                                                   |
| 0.4233                                                              | 1506.27                                      | 6                                                     | 0.8825   | 1232.61                                      | 116                                                   |
| 0.4840                                                              | 1460.51                                      | 35                                                    | 0.9300   | 1211.91                                      | 73                                                    |
| 0.5500                                                              | 1414.77                                      | 62                                                    | 0.9541   | 1201.84                                      | 38                                                    |
| $x_{IL}[\text{b3mpy}][\text{BF}_4] + (1-x_{IL})$ 1,4-dibromobutane  |                                              |                                                       |          |                                              |                                                       |
| 0.5599                                                              | 1385.38                                      | -76                                                   | 0.8085   | 1261.48                                      | 18                                                    |

Supplementary Material (ESI) for *PCCP*  
This journal is © the Owner Societies 2011

|        |                                                                       |     |        |         |     |
|--------|-----------------------------------------------------------------------|-----|--------|---------|-----|
| 0.6544 | 1334.96                                                               | -56 | 0.9010 | 1221.99 | 71  |
| 0.7307 | 1297.28                                                               | -15 | 0.9648 | 1196.70 | 70  |
| 0.7650 | 1281.21                                                               | -3  |        |         |     |
|        | $x_{IL}[\text{b3mpy}][\text{BF}_4] + (1 - x_{IL})$ 1,5-dibromobutane  |     |        |         |     |
| 0.7620 | 1272.93                                                               | -33 | 0.8901 | 1222.64 | 48  |
| 0.8332 | 1244.44                                                               | 9   | 0.9557 | 1198.72 | 64  |
| 0.8705 | 1230.12                                                               | 28  |        |         |     |
|        | $x_{IL}[\text{b4mpy}][\text{BF}_4] + (1 - x_{IL})$ 1,1-dibromomethane |     |        |         |     |
| 0.0223 | 2401.54                                                               | -39 | 0.5262 | 1492.89 | 60  |
| 0.0413 | 2339.26                                                               | -59 | 0.5918 | 1434.25 | 74  |
| 0.0711 | 2249.01                                                               | -70 | 0.6688 | 1373.59 | 84  |
| 0.1279 | 2098.73                                                               | -88 | 0.7200 | 1337.57 | 74  |
| 0.1973 | 1945.89                                                               | -64 | 0.7894 | 1293.03 | 68  |
| 0.2813 | 1795.45                                                               | -29 | 0.8499 | 1257.94 | 56  |
| 0.3935 | 1636.93                                                               | 12  | 0.9045 | 1228.83 | 34  |
| 0.4601 | 1559.77                                                               | 42  |        |         |     |
|        | $x_{IL}[\text{b4mpy}][\text{BF}_4] + (1 - x_{IL})$ 1,2-dibromoethane  |     |        |         |     |
| 0.4382 | 1535.10                                                               | -64 | 0.7593 | 1301.41 | 20  |
| 0.5056 | 1476.15                                                               | -44 | 0.8693 | 1242.67 | 30  |
| 0.5794 | 1418.51                                                               | -25 | 0.9422 | 1208.01 | 21  |
| 0.6654 | 1358.76                                                               | 1   |        |         |     |
|        | $x_{IL}[\text{b4mpy}][\text{BF}_4] + (1 - x_{IL})$ 1,3-dibromopropane |     |        |         |     |
| 0.0327 | 1922.18                                                               | -8  | 0.4211 | 1506.46 | 142 |
| 0.0982 | 1832.84                                                               | -25 | 0.4886 | 1455.78 | 167 |
| 0.1406 | 1779.92                                                               | -10 | 0.5525 | 1411.74 | 192 |
| 0.2153 | 1695.02                                                               | 39  | 0.6247 | 1366.20 | 201 |
| 0.2671 | 1641.87                                                               | 70  | 0.7054 | 1319.82 | 198 |
| 0.3157 | 1595.02                                                               | 94  | 0.7987 | 1271.60 | 150 |
| 0.3692 | 1548.81                                                               | 115 | 0.8969 | 1225.81 | 99  |
|        | $x_{IL}[\text{b4mpy}][\text{BF}_4] + (1 - x_{IL})$ 1,4-dibromobutane  |     |        |         |     |
| 0.4915 | 1423.32                                                               | 19  | 0.7330 | 1294.67 | 84  |
| 0.5194 | 1406.75                                                               | 35  | 0.8096 | 1259.87 | 68  |
| 0.5835 | 1370.54                                                               | 62  | 0.8974 | 1222.70 | 54  |
| 0.6564 | 1332.20                                                               | 75  | 0.9446 | 1203.94 | 33  |
|        | $x_{IL}[\text{b4mpy}][\text{BF}_4] + (1 - x_{IL})$ 1,5-dibromopentane |     |        |         |     |
| 0.7611 | 1272.03                                                               | 80  | 0.9131 | 1213.58 | 50  |
| 0.8345 | 1243.03                                                               | 71  |        |         |     |

---

TABLE S4. Coefficients  $A_i$  and  $k$ , and standard deviations  $s(Y_m^E)$ , obtained for equation (1).

| Mixture                                                                                   | $k_h$                                                           | $A_0$ | $A_1$  | $A_2$  | $A_3$ | $s$ |
|-------------------------------------------------------------------------------------------|-----------------------------------------------------------------|-------|--------|--------|-------|-----|
|                                                                                           | $Y_m^E = H_m^E / (\text{J} \cdot \text{mol}^{-1})$              |       |        |        |       |     |
| $x_{\text{IL}}[\text{b2mpy}][\text{BF}_4]^+$                                              |                                                                 |       |        |        |       |     |
| (1- $x_{\text{IL}}$ )BrCH <sub>2</sub> Br                                                 | 0.340                                                           | -257  | -1038  |        |       | 7   |
| (1- $x_{\text{IL}}$ )BrCH <sub>2</sub> CH <sub>2</sub> Br                                 | 4.529                                                           | 451   | -732   | 546    |       | 0   |
| (1- $x_{\text{IL}}$ )BrCH <sub>2</sub> (CH <sub>2</sub> )CH <sub>2</sub> Br               | 1.290                                                           | 1232  | -2569  | 1742   |       | 2   |
| (1- $x_{\text{IL}}$ )BrCH <sub>2</sub> (CH <sub>2</sub> ) <sub>2</sub> CH <sub>2</sub> Br | 2.098                                                           | 161   | -6     | -121   |       | 1   |
| $x_{\text{IL}}[\text{b3mpy}][\text{BF}_4]^+$                                              |                                                                 |       |        |        |       |     |
| (1- $x_{\text{IL}}$ )BrCH <sub>2</sub> Br                                                 | 0.771                                                           | -1084 | -4387  | 11840  | -8190 | 3   |
| (1- $x_{\text{IL}}$ )BrCH <sub>2</sub> CH <sub>2</sub> Br                                 | 5.693                                                           | 399   | -794   | 595    |       | 1   |
| (1- $x_{\text{IL}}$ )BrCH <sub>2</sub> (CH <sub>2</sub> )CH <sub>2</sub> Br               | 0.856                                                           | -566  | 13279  | -27018 | 15299 | 2   |
| (1- $x_{\text{IL}}$ )BrCH <sub>2</sub> (CH <sub>2</sub> ) <sub>2</sub> CH <sub>2</sub> Br | 2.097                                                           | 1122  | -2797  | 1752   |       | 2   |
| $x_{\text{IL}}[\text{b4mpy}][\text{BF}_4]^+$                                              |                                                                 |       |        |        |       |     |
| (1- $x_{\text{IL}}$ )BrCH <sub>2</sub> Br                                                 | 0.791                                                           | -1331 | -1829  | 6797   | -4952 | 3   |
| (1- $x_{\text{IL}}$ )BrCH <sub>2</sub> CH <sub>2</sub> Br                                 | 3.663                                                           | 505   | -920   | 874    |       | 1   |
| (1- $x_{\text{IL}}$ )BrCH <sub>2</sub> (CH <sub>2</sub> )CH <sub>2</sub> Br               | 0.451                                                           | -56   | 5767   | -4711  |       | 13  |
| (1- $x_{\text{IL}}$ )BrCH <sub>2</sub> (CH <sub>2</sub> ) <sub>2</sub> CH <sub>2</sub> Br | 1.565                                                           | 1978  | -4716  | 3440   |       | 2   |
| (1- $x_{\text{IL}}$ )BrCH <sub>2</sub> (CH <sub>2</sub> ) <sub>3</sub> CH <sub>2</sub> Br | 1.859                                                           | -171  | 286    | 99     |       | 1   |
| Mixture                                                                                   | $k_v$                                                           | $A_0$ | $A_1$  | $A_2$  | $A_3$ | $s$ |
|                                                                                           | $Y_m^E = 10^9 \cdot V_m^E / (\text{m}^3 \cdot \text{mol}^{-1})$ |       |        |        |       |     |
| $x_{\text{IL}}[\text{b2mpy}][\text{BF}_4]^+$                                              |                                                                 |       |        |        |       |     |
| (1- $x_{\text{IL}}$ )BrCH <sub>2</sub> Br                                                 | 0.676                                                           | -1243 | 535    | 950    | -1053 | 7   |
| (1- $x_{\text{IL}}$ )BrCH <sub>2</sub> CH <sub>2</sub> Br                                 | 3.999                                                           | -1760 | 2928   | -1956  |       | 3   |
| (1- $x_{\text{IL}}$ )BrCH <sub>2</sub> (CH <sub>2</sub> )CH <sub>2</sub> Br               | 0.442                                                           | 2229  | -12890 | 14094  |       | 12  |
| (1- $x_{\text{IL}}$ )BrCH <sub>2</sub> (CH <sub>2</sub> ) <sub>2</sub> CH <sub>2</sub> Br | 1.565                                                           | 1978  | -4716  | 3440   |       | 2   |
| $x_{\text{IL}}[\text{b3mpy}][\text{BF}_4]^+$                                              |                                                                 |       |        |        |       |     |
| (1- $x_{\text{IL}}$ )BrCH <sub>2</sub> Br                                                 | 0.626                                                           | -857  | 1387   |        |       | 7   |
| (1- $x_{\text{IL}}$ )BrCH <sub>2</sub> CH <sub>2</sub> Br                                 | 1.202                                                           | -816  | 1734   | 3      |       | 5   |
| (1- $x_{\text{IL}}$ )BrCH <sub>2</sub> (CH <sub>2</sub> )CH <sub>2</sub> Br               | 1.162                                                           | -786  | 1551   | 187    |       | 5   |
| (1- $x_{\text{IL}}$ )BrCH <sub>2</sub> (CH <sub>2</sub> ) <sub>2</sub> CH <sub>2</sub> Br | 3.468                                                           | -814  | 1645   |        |       | 5   |
| (1- $x_{\text{IL}}$ )BrCH <sub>2</sub> (CH <sub>2</sub> ) <sub>3</sub> CH <sub>2</sub> Br | 3.497                                                           | -528  | 318    | 1068   |       | 3   |
| $x_{\text{IL}}[\text{b4mpy}][\text{BF}_4]^+$                                              |                                                                 |       |        |        |       |     |
| (1- $x_{\text{IL}}$ )BrCH <sub>2</sub> Br                                                 | 0.513                                                           | -873  | 1701   |        |       | 5   |
| (1- $x_{\text{IL}}$ )BrCH <sub>2</sub> CH <sub>2</sub> Br                                 | 1.100                                                           | -727  | 1129   | 1      |       | 1   |
| (1- $x_{\text{IL}}$ )BrCH <sub>2</sub> (CH <sub>2</sub> )CH <sub>2</sub> Br               | 0.696                                                           | -387  | 1908   |        |       | 7   |
| (1- $x_{\text{IL}}$ )BrCH <sub>2</sub> (CH <sub>2</sub> ) <sub>2</sub> CH <sub>2</sub> Br | 0.601                                                           | -1330 | 2300   |        |       | 4   |
| (1- $x_{\text{IL}}$ )BrCH <sub>2</sub> (CH <sub>2</sub> ) <sub>3</sub> CH <sub>2</sub> Br | 2.182                                                           | 286   | 77     |        |       | 0   |
